# Supplementary material
Source: PubMed Central journal article supplement (PMC2629085)
Supplement: M807971200_1.pdf [file M807971200_1.pdf]

### Supplementary Figure

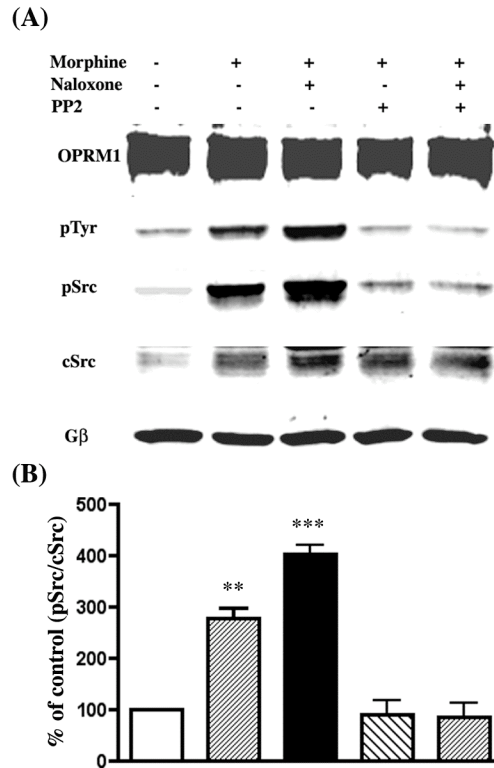

**Supplementary Figure.** *PP2 totally blocked chronic morphine-induced Src kinase activation and Tyr-phosphorylation.* (A) HEKMT cells were treated with 1  $\mu$ M morphine for 2 hrs followed by treatment with or without 10  $\mu$ M naloxone for 15 min. Src kinase inhibitor PP2 (2  $\mu$ M) was added 1 hr prior to the assay. Then lipid raft preparation and immunoprecipitation analyses were performed as described in the Experimental Procedures. The IP antibody was anti-HA (1:200) and the IB antibodies were anti-phospho-Tyr antibody (Upstate, 1:500), anti-pSrc (Tyr-416, Upstate, 1:500), anti-cSrc (Santa Cruz, 1:500) or anti-G $\beta$  (Santa Cruz, 1:500). (B) *Quantitative analysis of panels (A).* The density of pSrc versus the density of cSrc in control cells (without drug treatment) was considered to be 100%. All the experiments were repeated three times. \*\* denotes  $P < 0.01$  and \*\*\* denotes  $P < 0.001$  when compared with control using unpaired *t*-test.
